# Supplementary material for: A NaX zeolite framework containing magnetic MgFe2O4/CdO nanoparticles: synthesis, characterization and catalytic performance in the decontamination of 2-chloroethyl phenyl sulfide (2-CEPS) as a model of sulfur mustard agent
Source: Royal Society of Chemistry journal article supplement (doi:10.1039/d1nj04202e), 2021-01-01
Supplement: d1nj04202e1.pdf [file d1nj04202e1.pdf]

## Supporting information

**NaX zeolite framework containing of magnetic  $\text{MgFe}_2\text{O}_4/\text{CdO}$  nanoparticles: synthesis, characterization and catalytic performance in the decontamination of 2-chloroethyl phenylsulfide (2-CEPS) as a model of sulfur mustard agent**

**Meysam Sadeghi,<sup>a</sup> Saeed Farhadi<sup>\*a</sup> and Abedin Zabardasti<sup>a</sup>**

Department of Chemistry, Lorestan University, Khorramabad, 68151-44316, Iran.

Email addresses: farhadi.s@lu.ac.ir; and sfarhadi1348@yahoo.com (S. Farhadi)

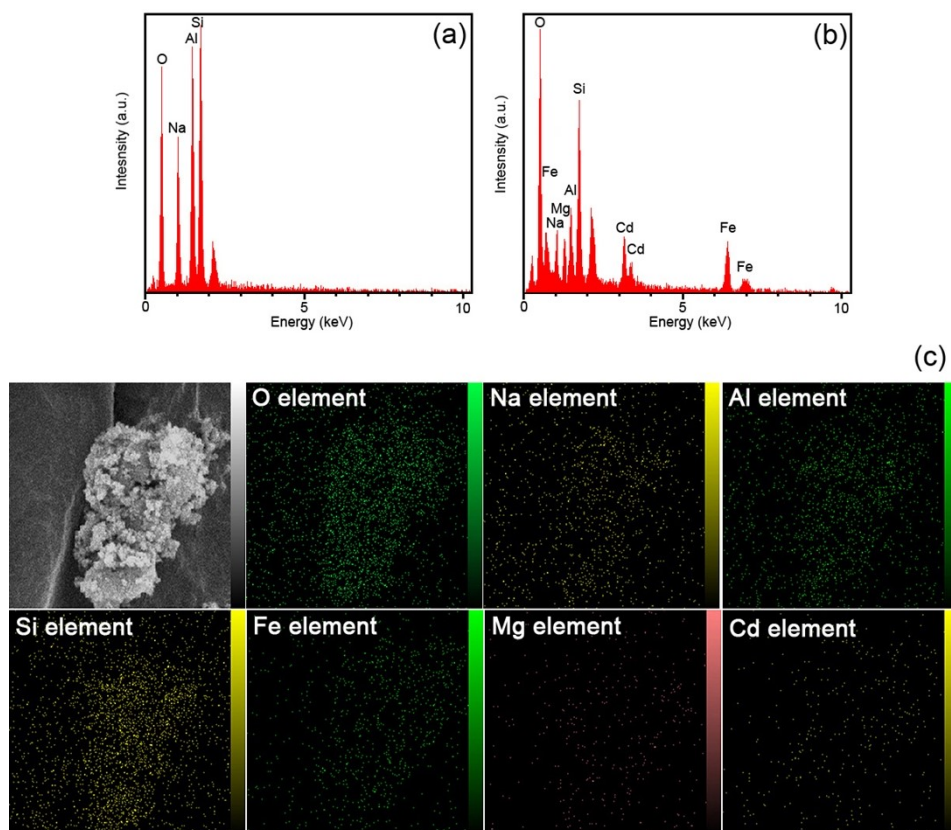

**Fig. S1.** EDAX analyses of: a) bare NaX and b) NaX/MgFe<sub>2</sub>O<sub>4</sub>/CdO. c) FESEM micrograph along with the EDAX elemental dot-mappings of the NaX/MgFe<sub>2</sub>O<sub>4</sub>/CdO.

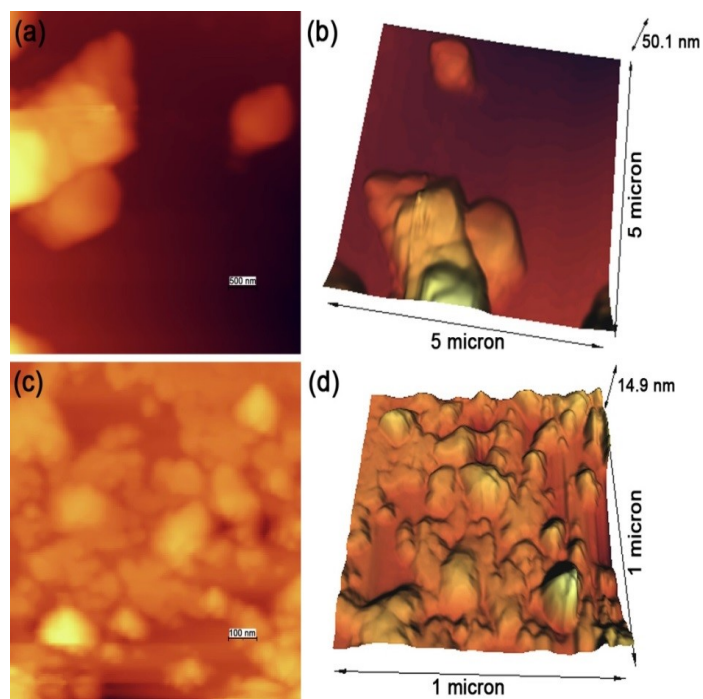

**Fig. S2.** 2D and 3D AFM micrographs of: a) and b) bare NaX, c) and d) NaX/MgFe<sub>2</sub>O<sub>4</sub>/CdO.

### S1. GC-MS analysis

In order to precisely identify the 2-CEPS degradation products in the reaction with the zeolite NaX/MgFe<sub>2</sub>O<sub>4</sub>/CdO nanocomposite, a gas chromatography accompanied with mass spectrometry (GC-MS) analysis was utilized. As can be demonstrated in Fig.S3, the five specified peaks at different retention times were observed. The two peaks observed near 5.4 min and 8.3 min can be allocated to the n-heptane solvent and toluene internal standard, respectively. Furthermore, the three other characteristic peaks were recognized approximately 9.5 min to 12.2 min, which were corresponded to the 2-CEPS and its hydrolysis and elimination reaction products. Additionally, the mass spectra of 2-CEPS (*m/z* values 28, 45, 65, 109, 123, and 172) and its hydrolysis and elimination reaction products, involving 2-hydroxyl ethyl phenyl sulfide (2-HEPS) (*m/z* values 28, 43, 59, 85, 131, and 154) and phenyl vinyl sulfide (PVS) (*m/z* values 28, 39, 51, 65, 77, 91, 109, and 135) were clearly detected, respectively.

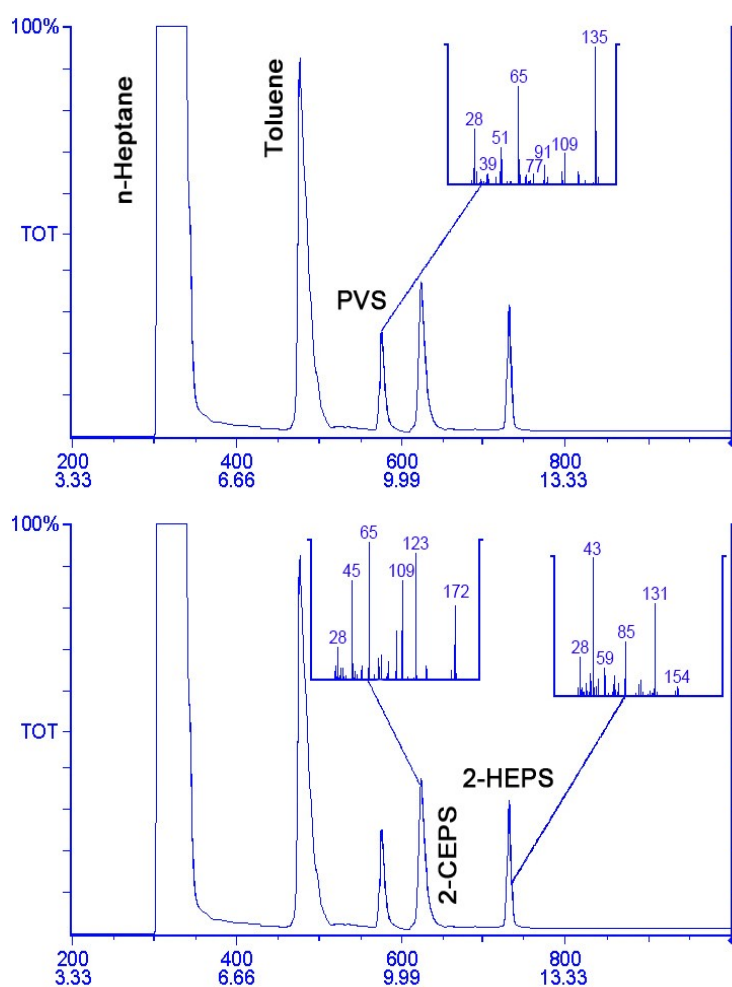

**Fig. S3.** GC-MS analysis and mass spectra of the 2-CEPS decontamination over the NaX/MgFe<sub>2</sub>O<sub>4</sub>/CdO.

**Table S1.** The EDAX analysis data for the NaX/MgFe<sub>2</sub>O<sub>4</sub>/CdO.

| Element | Line | Atomic% | Weight% |
|---------|------|---------|---------|
| O       | Ka   | 75.72   | 60.40   |
| Na      | Ka   | 6.68    | 7.66    |
| Al      | Ka   | 4.03    | 5.42    |
| Si      | Ka   | 8.36    | 11.71   |
| Fe      | Ka   | 3.21    | 8.93    |
| Mg      | Ka   | 0.72    | 2.13    |
| Cd      | La   | 1.28    | 3.76    |
| Total   | -    | 100.00  | 100.00  |

**Table S2.** The acquired data from the N<sub>2</sub>-BET, BJH and t plots corresponded to the as-synthesized catalysts at 77 K.

| Sample                                    | a <sub>s</sub> , BET<br>[m <sup>2</sup> g <sup>-1</sup> ] | V <sub>me</sub><br>[cm <sup>3</sup> (STP)g <sup>-1</sup> ] | V <sub>mi</sub><br>[cm <sup>3</sup> (STP)g <sup>-1</sup> ] | Total<br>pore<br>volume<br>[cm <sup>3</sup> g <sup>-1</sup> ] | Average<br>pore<br>diameter<br>[nm] |
|-------------------------------------------|-----------------------------------------------------------|------------------------------------------------------------|------------------------------------------------------------|---------------------------------------------------------------|-------------------------------------|
| zeolite NaX                               | 359.18                                                    | 1.34                                                       | 0.11                                                       | 1.45                                                          | 12.53                               |
| NaX/MgFe <sub>2</sub> O <sub>4</sub> /CdO | 141.34                                                    | 0.85                                                       | 0.01                                                       | 0.86                                                          | 8.75                                |

**Table S3.** GC-FID outcomes for the decontamination of 2-CEPS over the NaX/MgFe<sub>2</sub>O<sub>4</sub>/CdO at different time intervals (optimal conditions; solvent: n-heptane, catalyst dosage: 50 mg).

| Time Intervals<br>(min) |     | 2-CEPS (AUC <sub>a</sub> ) | Toluene Internal Standard<br>(AUC <sub>b</sub> ) | Surface Ratios<br>(AUC <sub>a</sub> :AUC <sub>b</sub> ) |
|-------------------------|-----|----------------------------|--------------------------------------------------|---------------------------------------------------------|
| i                       | 0   | 398623                     | 349175                                           | 1.1416                                                  |
| ii                      | 20  | 190275                     | 274409                                           | 0.6934                                                  |
| iii                     | 40  | 143172                     | 258621                                           | 0.5536                                                  |
| iv                      | 60  | 73390                      | 232764                                           | 0.3153                                                  |
| v                       | 80  | 53659                      | 235700                                           | 0.2267                                                  |
| vi                      | 100 | 46861                      | 459875                                           | 0.1019                                                  |
| vii                     | 120 | 00000                      | 345772                                           | 0.0000                                                  |

**Table S4.** First-order kinetic parameters for the decontamination of 2-CEPS in the presence of different catalysts (optimal conditions; reaction time: 120 min, solvent: n-heptane, catalyst dosage: 50 mg).

| Catalyst type                             | Apparent rate<br>constant<br>(k <sub>app</sub> , min <sup>-1</sup> ) | Half-life<br>(t <sub>1/2</sub> , min) | First order kinetic equation<br>(ln C <sub>o</sub> /C <sub>t</sub> = k <sub>app</sub> t ± b) |
|-------------------------------------------|----------------------------------------------------------------------|---------------------------------------|----------------------------------------------------------------------------------------------|
| Without catalyst (blank)                  | 00                                                                   | 00                                    | ln C <sub>o</sub> /C <sub>t</sub> = 00                                                       |
| bare CdO                                  | 0.003                                                                | 231.00                                | ln C <sub>o</sub> /C <sub>t</sub> = 0.003t - 0.010                                           |
| bare MgFe <sub>2</sub> O <sub>4</sub>     | 0.005                                                                | 138.60                                | ln C <sub>o</sub> /C <sub>t</sub> = 0.005t - 0.042                                           |
| bare NaX                                  | 0.007                                                                | 99.00                                 | ln C <sub>o</sub> /C <sub>t</sub> = 0.007t + 0.067                                           |
| MgFe <sub>2</sub> O <sub>4</sub> /CdO     | 0.010                                                                | 69.30                                 | ln C <sub>o</sub> /C <sub>t</sub> = 0.010t + 0.026                                           |
| NaX/CdO                                   | 0.012                                                                | 57.75                                 | ln C <sub>o</sub> /C <sub>t</sub> = 0.012t + 0.012                                           |
| NaX/MgFe <sub>2</sub> O <sub>4</sub>      | 0.149                                                                | 46.20                                 | ln C <sub>o</sub> /C <sub>t</sub> = 0.149t - 0.073                                           |
| NaX/MgFe <sub>2</sub> O <sub>4</sub> /CdO | 0.219                                                                | 31.64                                 | ln C <sub>o</sub> /C <sub>t</sub> = 0.219t - 0.026                                           |
